# Supplementary material for: Brief communication: Comparison of in-situ ephemeral snow depth measurements over a mixed-use temperate forest landscape
Source: Copernicus journal article supplement (doi:10.5194/tc-2023-36), 2023-03-14
Supplement: Supplementary file 1 [file tc-2023-36-supplement.zip]

**Table S1:** Summarized statistics of snow depths for the magnaprobe and snow tube techniques by the individual points and the grid cell averaged values for each of the sampling campaign dates. All units are cm except slope and R, which are dimensionless.

| Date               | Magnaprobe<br>Mean (Std) | Snow tube<br>Mean (Std) | Bias | N   | Intercept | Slope | R    | MAE | RMSD |
|--------------------|--------------------------|-------------------------|------|-----|-----------|-------|------|-----|------|
| All Measurements   |                          |                         |      |     |           |       |      |     |      |
| 18 December        | 15.5 (3.1)               | 13.2 (2.9)              | 2.3  | 351 | -1.19     | 0.92  | 0.79 | 2.4 | 3.0  |
| 4 February         | 15.2 (2.8)               | 13.9 (2.7)              | 1.4  | 351 | -0.73     | 0.96  | 0.77 | 1.6 | 2.3  |
| 24 February        | 13.6 (3.8)               | 12.2 (3.4)              | 1.4  | 234 | 0.17      | 0.89  | 0.66 | 2.2 | 3.3  |
| All Dates          | 14.9 (3.3)               | 13.2 (3.0)              | 1.7  | 936 | -0.05     | 0.92  | 0.74 | 2.0 | 2.9  |
| Grid Cell Averages |                          |                         |      |     |           |       |      |     |      |
| 18 December        | 15.5 (2.6)               | 13.3 (2.5)              | 2.3  | 39  | -1.83     | 0.97  | 0.92 | 2.3 | 2.5  |
| 4 February         | 15.2 (2.3)               | 13.8 (2.3)              | 1.4  | 39  | -1.4      | 1.0   | 0.87 | 1.4 | 1.8  |
| 24 February        | 13.6 (3.0)               | 12.2 (2.7)              | 1.4  | 26  | -0.03     | 0.91  | 0.81 | 1.7 | 2.3  |
| All Dates          | 14.9 (2.7)               | 13.2 (2.5)              | 1.7  | 104 | -0.99     | 0.95  | 0.87 | 1.8 | 2.2  |
