# Supplementary material for: Brief communication: Comparison of in-situ ephemeral snow depth measurements over a mixed-use temperate forest landscape
Source: Copernicus journal article supplement (doi:10.5194/tc-2023-36), 2023-03-14
Supplement: Supplementary file [file tc-2023-36-RC1-supplement.pdf]

**Review comments** on tc-2023-36 manuscript, entitled, " Brief communication: Comparison of in-situ ephemeral snow depth measurements over a mixed-use temperate forest landscape".

**General comments:**

The tc-2022-7 manuscript, entitled, " Brief communication: Comparison of in-situ ephemeral snow depth measurements over a mixed-use temperate forest landscape" presents comparison snow depth measurements from two manual instruments (a magnaprobe snow depth probe and a federal snow tube) in a field and forest. A total of 936 paired observations are compared from sampling campaigns from December 2020 to February 2021.

The objectives of the study are to investigate the snow depth measurements using a magnaprobe and a federal tube are in an ephemeral snow environment with shallow snow and analyse differences whether related by land cover type.

As a general comment, the manuscript is designed and written well. It consists of extensive and important number measurements conducted and provided.

I would like to see and wonder following points,

- In line 125: "Snow depth was derived by manual inspection of the photos and recorded to the nearest cm." How are these snow depth measurements used? were they compared with magnaprobe and federal tube measurements?
- In line 134: "Leaf litter depth was measured on 2 April 2021 after the spring snowmelt. The leaf litter depth was measured at each snow depth sample location." There has been discussion on the effect of these litter depths with a different instrument. Since the measurements were done and I would expect to see some results or at least discussion on how these measurements can be used to calibrate the snow depth measurements with these two instruments (magnaprobe and deferral tube).

Please check references : I could not see "Lopez-Moreno et al.'s (2020)" in references
